# Supplementary material for: Gut microbiome is associated with recurrence-free survival in patients with resected Stage IIIB-D or Stage IV melanoma treated with immune checkpoint inhibitors
Source: PubMed Central journal article supplement — bioRxiv. 2024 Apr 20:2024.04.16.589761. Preprint. [Version 1] doi: 10.1101/2024.04.16.589761 (PMC11042335; doi:10.1101/2024.04.16.589761), 2024-04-20
Supplement: NIHPP2024.04.16.589761v1-supplement-1.pdf [file NIHPP2024.04.16.589761v1-supplement-1.pdf]

## **Supplement Table of Contents**

### **Tables**

Supplemental Table 1. Region Stratified ANCOM-BC Results

### **Figures**

Supplemental Figure 1. Study Consort Chart

Supplemental Figure 2. JSD Distances Across Time, Stratified by Trial Arm

Supplemental Figure 3. JSD Distances Across Time, Stratified by Recurrence Status

Supplemental Figure 4. PCOA Plot by Time Points

**Supplemental Table 1. Region Stratified ANCOM-BC Results**

| <b>Region</b>  | <b>Recurrence Associated Strain</b> | <b>OR</b> | <b>95% CI, low</b> | <b>95% CI, high</b> | <b>p-val</b> | <b>q-val</b> |
|----------------|-------------------------------------|-----------|--------------------|---------------------|--------------|--------------|
| North America  | Firmicutes bacterium CAG:137        | 0.17      | 0.25               | 0.11                | 1.64E-05     | 0.028        |
| North America  | Firmicutes bacterium CAG:884        | 0.40      | 0.49               | 0.33                | 8.43E-06     | 0.015        |
| North America  | Clostridium sp. CAG:780             | 0.21      | 0.30               | 0.15                | 9.26E-06     | 0.016        |
| North America  | Eubacterium sp. CAG:115             | 0.054     | 0.10               | 0.030               | 9.76E-07     | 0.0017       |
| North America  | Eubacterium sp. CAG:786             | 0.09      | 0.13               | 0.058               | 1.67E-10     | 2.89E-07     |
| North America  | Peptostreptococcus anaerobius       | 0.49      | 0.58               | 0.42                | 1.13E-05     | 0.020        |
| North America  | Eubacterium siraeum                 | 0.088     | 0.15               | 0.052               | 3.39E-06     | 0.006        |
| North America  | Ruminococcus sp. CAG:177            | 0.059     | 0.11               | 0.033               | 9.74E-07     | 0.0017       |
| North America  | Aeromonas salmonicida               | 0.42      | 0.51               | 0.34                | 2.37E-05     | 0.041        |
| Western Europe | Bariatricus massiliensis            | 1.49      | 1.64               | 1.36                | 1.50E-05     | 0.028        |
| Western Europe | Blautia schinkii                    | 1.45      | 1.58               | 1.33                | 1.13E-05     | 0.021        |
| Eastern Europe | Lawsonia intracellularis            | 2.50      | 3.09               | 2.02                | 1.62E-05     | 0.030        |
| Rest of World  | Clostridiales bacterium 1_7_47FAA   | 0.22      | 0.31               | 0.15                | 1.60E-05     | 0.032        |

Table shows the results of ANCOM-BC analysis of recurrence as the outcome with GMB as the core predictor with adjustment for participant age, sex, tumor stage, BRAF mutation and study arm. Odds ratios (ORs) are shown with associated p-values as well as adjusted values using the “holm” method.

**Supplemental Table 2: Patients with Longitudinal Sampling**

| <b>Variable</b>          | <b>No</b>     | <b>Yes</b>    | <b>OR</b>          | <b>pval</b> |
|--------------------------|---------------|---------------|--------------------|-------------|
| N                        | 424           | 301           |                    |             |
| <b>Recurrence</b>        |               |               |                    |             |
| No                       | 228 (55.2%)   | 219 (72.8%)   | 0.46 (0.33 - 0.64) | 1.68E-06    |
| Yes                      | 185 (44.8%)   | 82 (27.2%)    | -                  | -           |
| Missing (n = 11)         |               |               |                    |             |
| Age Mean± SD             | 54.54± 14.32  | 55.4± 13.3    | -                  | 0.685       |
| <b>Gender</b>            |               |               |                    |             |
| Female                   | 178 (42.4%)   | 120 (39.9%)   | 1.11 (0.81 - 1.52) | 0.54        |
| Male                     | 242 (57.6%)   | 181 (60.1%)   | -                  | -           |
| Missing (n = 4)          |               |               |                    |             |
| <b>Region</b>            |               |               |                    |             |
| Australia                | 77 (18.2%)    | 64 (21.3%)    | -                  | 0.13        |
| Eastern Europe           | 24 (5.7%)     | 21 (7%)       | -                  | 0.125       |
| ROW                      | 29 (6.8%)     | 19 (6.3%)     | -                  | 0.284       |
| North America            | 66 (15.6%)    | 39 (13%)      | -                  | 0.295       |
| Western Europe           | 224 (52.8%)   | 158 (52.5%)   | -                  | 0.148       |
| <b>Stage at entry</b>    |               |               |                    |             |
| Not Reported             | 7 (1.7%)      | 0 (0%)        | -                  | 1           |
| Stage IIIB               | 113 (26.7%)   | 102 (33.9%)   | -                  | 0.125       |
| Stage IIIC               | 234 (55.2%)   | 152 (50.5%)   | -                  | 0.16        |
| Stage IIID               | 10 (2.4%)     | 5 (1.7%)      | -                  | 0.53        |
| Stage IV                 | 56 (13.2%)    | 42 (14%)      | -                  | 0.141       |
| <b>B.Raf.Mut</b>         |               |               |                    |             |
| Invalid/Not Reported     | 104 (24.5%)   | 75 (24.9%)    | -                  | 0.145       |
| Mutant                   | 119 (28.1%)   | 79 (26.2%)    | -                  | 0.157       |
| Wildtype                 | 197 (46.5%)   | 147 (48.8%)   | -                  | 0.141       |
| <b>Melanoma Subtypes</b> |               |               |                    |             |
| Acral                    | 14 (3.3%)     | 9 (3%)        | -                  | 0.268       |
| Cutaneous                | 357 (84.2%)   | 264 (87.7%)   | -                  | 0.142       |
| Mucosal                  | 4 (0.9%)      | 1 (0.3%)      | -                  | 1           |
| Not Reported             | 8 (1.9%)      | 0 (0%)        | -                  | 1           |
| Other                    | 37 (8.7%)     | 27 (9%)       | -                  | 0.146       |
| LD_baseline Mean± SD     | 218.92± 85.25 | 213.48± 88.16 | -                  | 0.207       |

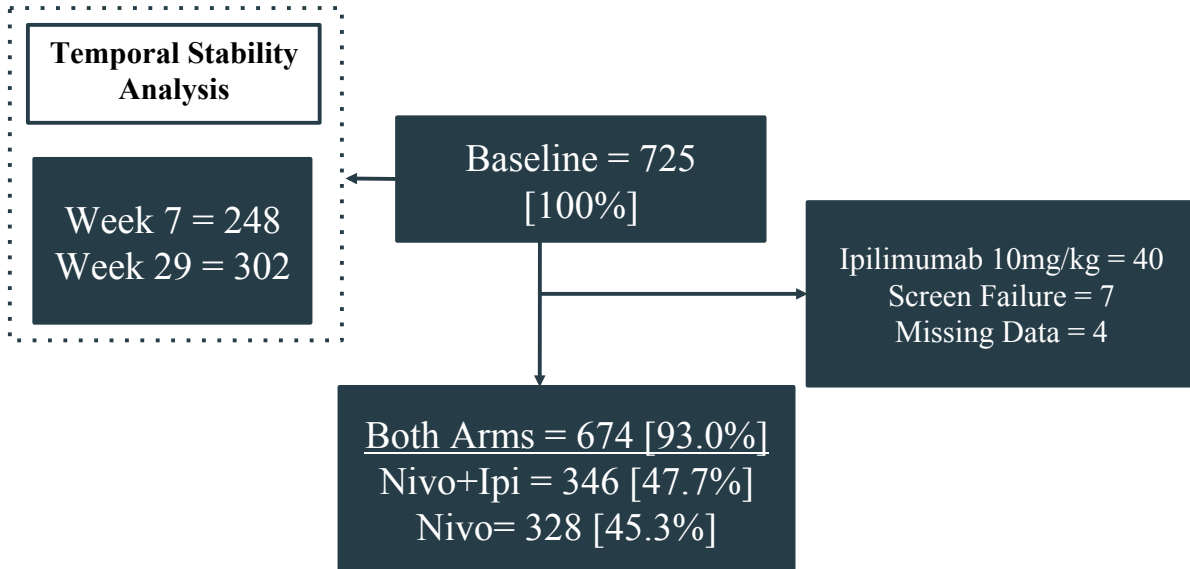

**Supplemental Figure 1. Study Consort Chart**

725 represented baseline. Of these, approximately half of the patients had follow-up sampling at weeks 7 and 29. From the baseline samples, 51 individuals were excluded due to coming from a supplementary arm of the original trial (n = 40), being screen failures (n = 7) or having missing randomization data (n = 4). Overall we utilized 674/725 (93.0%) of the available shotgun metagenomic samples for our core analysis.

**A. GMB Stability: Nivolumab 480mg**

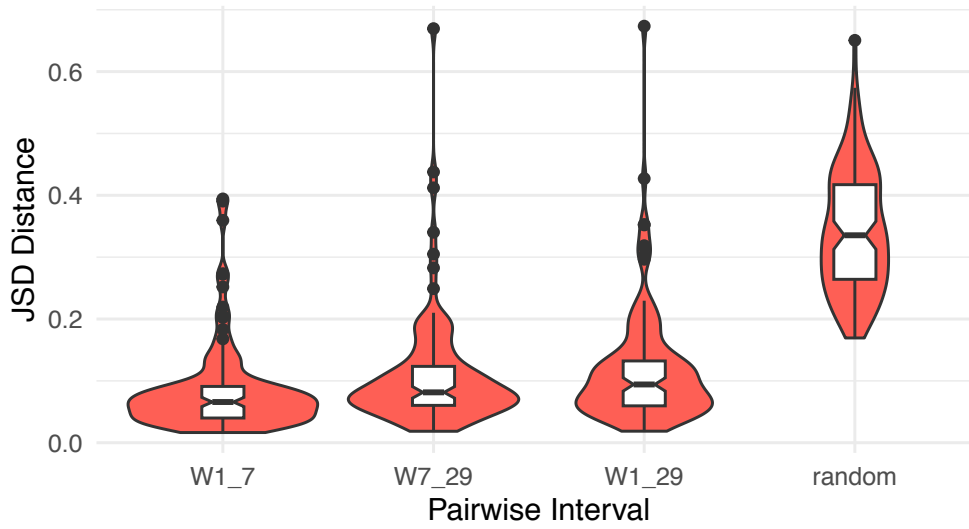

**B. GMB Stability: Nivo240mg+Ipi1mg/kg**

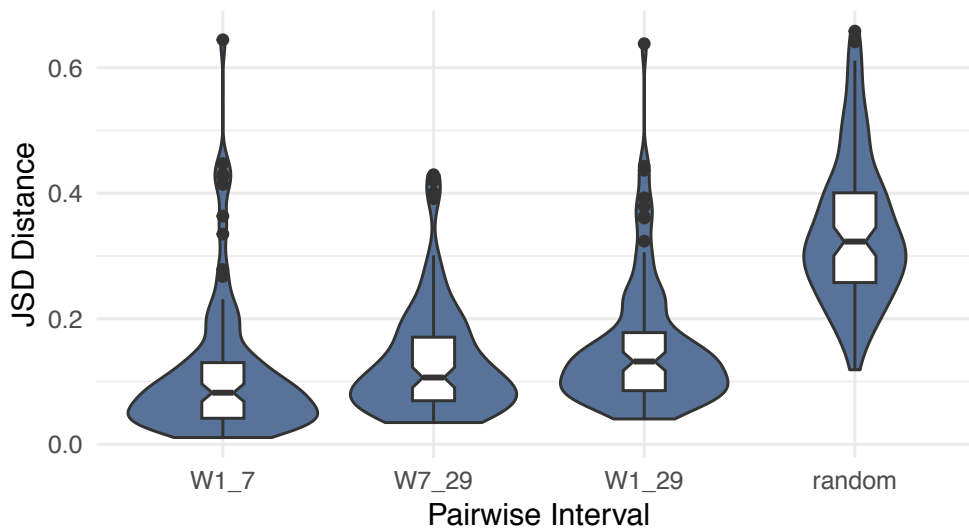

**Supplemental Figure 2. JSD Distances Across Time, Stratified by Trial Arm**

The figure shows the bacterial  $\beta$ -diversity measured using Jensen Shannon divergence between measured visits (intra-patient variation) as well as between all unpaired samples for reference (inter-patient variation), stratified by the treatment arm (red, panel A is mono treatment and blue panel B is combination treatment). Overall GMB was largely unchanged across baseline, week 7 and week 29 measurements in both arms.

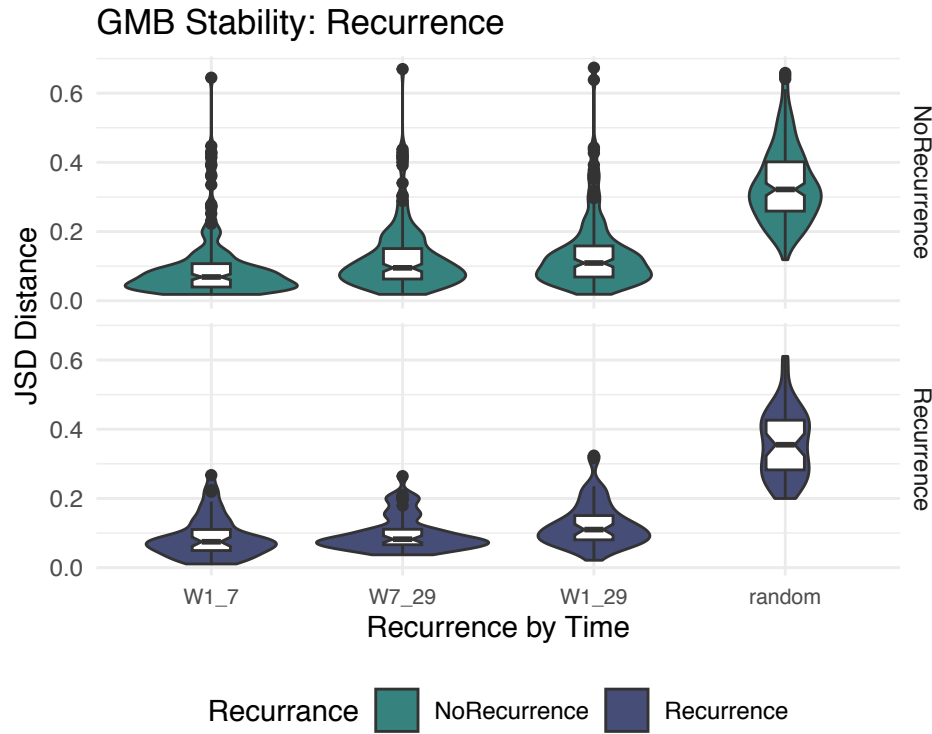

**Supplemental Figure 3. JSD Distances Across Time, Stratified by Recurrence Status**

The figure shows the bacterial  $\beta$ -diversity measured using Jensen Shannon divergence between measured visits (intra-patient variation) as well as between all unpaired samples for reference (inter-patient variation), stratified by recurrence status (green, panel A: no recurrence group and navy, panel B, recurrence group). Overall GMB was largely unchanged across baseline, week 7 and week 29 measurements in both panels.

### PCoA jsd rarefied at 5e+05

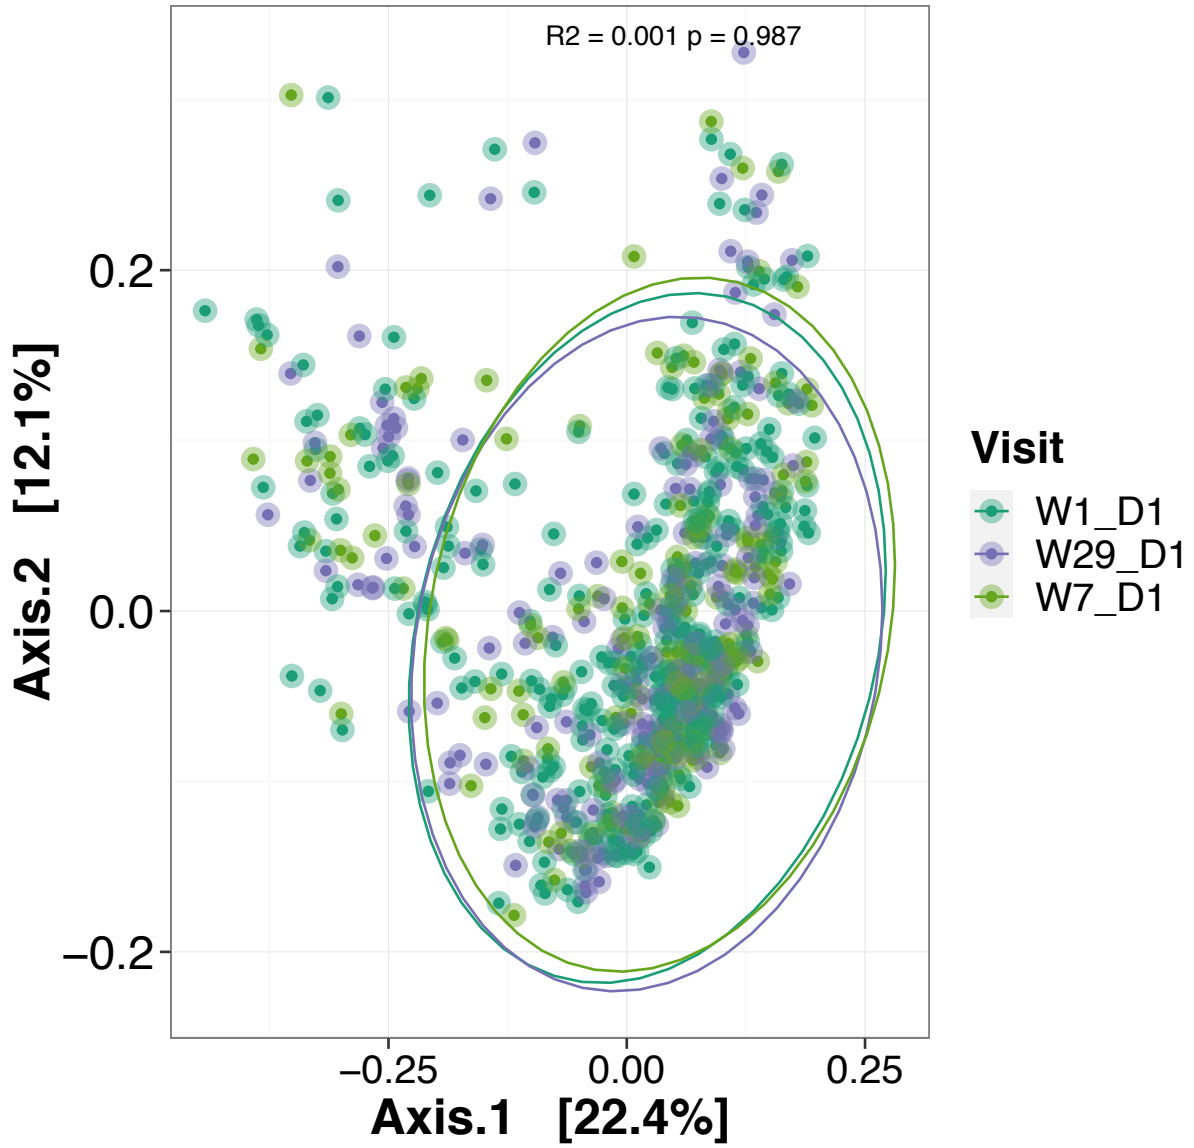

#### Supplemental Figure 3. PCOA plot by Time Points

PCOA plot for three-time points as the outcome for the BMS patients using JSD distances.
